# Supplementary material for: Integrating Metabolomics and Network Pharmacology to Explore the Mechanism of Xiao-Yao-San in the Treatment of Inflammatory Response in CUMS Mice
Source: Pharmaceuticals (Basel). 2023 Nov 14;16(11):1607. doi: 10.3390/ph16111607 (PMC10675308; doi:10.3390/ph16111607)
Supplement: Supplementary file 1 [file pharmaceuticals-16-01607-s001.zip › Table S1 Differential metabolite HMDB database corresponding target information.xlsx]

## Sheet: Sheet1
Metabolite name	Target Name	UniProt ID	Gene Name
Betaine	Choline dehydrogenase, mitochondrial	Q8NE62	CHDH
	Alpha-aminoadipic semialdehyde dehydrogenase	P49419	ALDH7A1
	Betaine--homocysteine S-methyltransferase 1	Q93088	BHMT
	Sodium- and chloride-dependent betaine transporter	P48065	SLC6A12
	S-methylmethionine--homocysteine S-methyltransferase BHMT2	Q9H2M3	BHMT2
Nicotinamide	Nicotinamide N-methyltransferase	P40261	NNMT
	Tankyrase-2	Q9H2K2	TNKS2
	NAD-dependent protein deacetylase sirtuin-6	Q8N6T7	SIRT6
	Poly [ADP-ribose] polymerase 3	Q9Y6F1	PARP3
	Ecto-ADP-ribosyltransferase 3	Q13508	ART3
	Ecto-ADP-ribosyltransferase 5	Q96L15	ART5
	GPI-linked NAD(P)(+)--arginine ADP-ribosyltransferase 1	P52961	ART1
	Tankyrase-1	O95271	TNKS
	Poly [ADP-ribose] polymerase 1	P09874	PARP1
	ADP-ribosyl cyclase 2	Q10588	BST1
	Poly [ADP-ribose] polymerase 2	Q9UGN5	PARP2
	ADP-ribosyl cyclase 1	P28907	CD38
	Ecto-ADP-ribosyltransferase 4	Q93070	ART4
	Poly [ADP-ribose] polymerase 4	Q9UKK3	PARP4
	Cytochrome P450 3A4	P08684	CYP3A4
	Cytochrome P450 2E1	P05181	CYP2E1
	Cytochrome P450 2D6	P10635	CYP2D6
	L-lactate dehydrogenase A chain	P00338	LDHA
	Purine nucleoside phosphorylase	P00491	PNP
	Nicotinamide phosphoribosyltransferase	P43490	NAMPT
	Poly [ADP-ribose] polymerase 10	Q53GL7	PARP10
	Poly [ADP-ribose] polymerase 11	Q9NR21	PARP11
	Poly [ADP-ribose] polymerase 12	Q9H0J9	PARP12
	Poly [ADP-ribose] polymerase 14	Q460N5	PARP14
	Poly [ADP-ribose] polymerase 15	Q460N3	PARP15
	Mono [ADP-ribose] polymerase PARP16	Q8N5Y8	PARP16
	Poly [ADP-ribose] polymerase 6	Q2NL67	PARP6
	Poly [ADP-ribose] polymerase 8	Q8N3A8	PARP8
	Poly [ADP-ribose] polymerase 9	Q8IXQ6	PARP9
	TCDD-inducible poly [ADP-ribose] polymerase	Q7Z3E1	TIPARP
	NAD-dependent protein deacetylase sirtuin-1	Q96EB6	SIRT1
	NAD-dependent protein deacetylase sirtuin-2	Q8IXJ6	SIRT2
	NAD-dependent protein deacetylase sirtuin-3, mitochondrial	Q9NTG7	SIRT3
	NAD-dependent protein deacetylase sirtuin-4	Q9Y6E7	SIRT4
	NAD-dependent protein deacylase sirtuin-5, mitochondrial	Q9NXA8	SIRT5
	NAD-dependent protein deacetylase sirtuin-7	Q9NRC8	SIRT7
	tRNA 2'-phosphotransferase 1	Q86TN4	TRPT1
L-Glutamic acid	Aspartate aminotransferase, cytoplasmic	P17174	GOT1
	Aspartate aminotransferase, mitochondrial	P00505	GOT2
Creatine	Guanidinoacetate N-methyltransferase	Q14353	GAMT
	Glycine amidinotransferase, mitochondrial	P50440	GATM
	Creatine kinase S-type, mitochondrial	P17540	CKMT2
	Creatine kinase B-type	P12277	CKB
	Creatine kinase U-type, mitochondrial	P12532	CKMT1A
	Creatine kinase M-type	P06732	CKM
	Sodium- and chloride-dependent creatine transporter 1	P48029	SLC6A8
	Paired mesoderm homeobox protein 1	P54821	PRRX1
	DNA-binding protein inhibitor ID-3	Q02535	ID3
5-oxoproline	Glutaminyl-peptide cyclotransferase	Q16769	QPCT
	5-oxoprolinase	O14841	OPLAH
	Angiogenin	P03950	ANG
	Alpha-amylase 1	P04745	AMY1A
	Pancreatic alpha-amylase	P04746	AMY2A
	Vascular endothelial growth factor A	P15692	VEGFA
	Alpha-amylase 2B	P19961	AMY2B
	Orexin	O43612	HCRT
	Gamma-glutamylcyclotransferase	O75223	GGCT
	Ig lambda-1 chain C regions	P0CG04	IGLC1
	Gamma-glutamylaminecyclotransferase	Q9BVM4	GGACT
Inosine	5'-nucleotidase	P21589	NT5E
	Cytosolic 5'-nucleotidase 1B	Q96P26	NT5C1B
	Cytosolic 5'-nucleotidase 1A	Q9BXI3	NT5C1A
	5'(3')-deoxyribonucleotidase, cytosolic type	Q8TCD5	NT5C
	5'(3')-deoxyribonucleotidase, mitochondrial	Q9NPB1	NT5M
	Xanthine dehydrogenase/oxidase	P47989	XDH
	Adenosine deaminase	P00813	ADA
	Equilibrative nucleoside transporter 4	Q7RTT9	SLC29A4
	Cytosolic 5'-nucleotidase 3	Q9H0P0	NT5C3
	Cytosolic purine 5'-nucleotidase	P49902	NT5C2
	Purine nucleoside phosphorylase	P00491	PNP
	tRNA-specific adenosine deaminase 1	Q9BUB4	ADAT1
	Adenosine deaminase CECR1	Q9NZK5	CECR1
Palmitoylcarnitine	Name	UniProt ID	Gene Name
	Carnitine O-palmitoyltransferase 1, muscle isoform	Q92523	CPT1B
	Carnitine O-palmitoyltransferase 1, liver isoform	P50416	CPT1A
	Carnitine O-palmitoyltransferase 2, mitochondrial	P23786	CPT2
	Carnitine O-palmitoyltransferase 1, brain isoform	Q8TCG5	CPT1C
	Long-chain-fatty-acid--CoA ligase 1	P33121	ACSL1
L-Phenylalanine	Tyrosine 3-monooxygenase	P07101	TH
	Phenylalanine--tRNA ligase alpha subunit	Q9Y285	FARSA
	Phenylalanine--tRNA ligase, mitochondrial	O95363	FARS2
	Tyrosine aminotransferase	P17735	TAT
	Aromatic-L-amino-acid decarboxylase	P20711	DDC
	Lactoperoxidase	P22079	LPO
	Phenylalanine-4-hydroxylase	P00439	PAH
	Peroxiredoxin-6	P30041	PRDX6
	Myeloperoxidase	P05164	MPO
	Aspartate aminotransferase, cytoplasmic	P17174	GOT1
	Aspartate aminotransferase, mitochondrial	P00505	GOT2
	Eosinophil peroxidase	P11678	EPX
	Kynurenine--oxoglutarate transaminase 1	Q16773	CCBL1
	Phenylalanine--tRNA ligase beta subunit	Q9NSD9	FARSB
	Large neutral amino acids transporter small subunit 2	Q9UHI5	SLC7A8
	Monocarboxylate transporter 10	Q8TF71	SLC16A10
	Angiotensin-converting enzyme 2	Q9BYF1	ACE2
	L-amino-acid oxidase	Q96RQ9	IL4I1
	FARSLA protein	Q6IBR2	FARSLA
Ergothioneine	Solute carrier family 22 member 4	Q9H015	SLC22A4
Docosahexaenoic acid	Cytosolic acyl coenzyme A thioester hydrolase	O00154	ACOT7
	Acyl-coenzyme A thioesterase 2, mitochondrial	P49753	ACOT2
	Acyl-coenzyme A thioesterase 4	Q8N9L9	ACOT4
	Cytochrome P450 2U1	Q7Z449	CYP2U1
	Acyl-coenzyme A thioesterase 1	Q86TX2	ACOT1
8Z,11Z,14Z-Eicosatrienoic acid	Bile acid-CoA:amino acid N-acyltransferase	Q14032	BAAT
	Cytosolic acyl coenzyme A thioester hydrolase	O00154	ACOT7
	Acyl-coenzyme A thioesterase 2, mitochondrial	P49753	ACOT2
	Acyl-coenzyme A thioesterase 4	Q8N9L9	ACOT4
	Acyl-coenzyme A thioesterase 8	O14734	ACOT8
	Acyl-coenzyme A thioesterase 1	Q86TX2	ACOT1
D-Glucose 6-phosphate	Glucokinase	P35557	GCK
	Hexokinase-3	P52790	HK3
	Hexokinase-2	P52789	HK2
	Hexokinase-1	P19367	HK1
	Glucose-6-phosphate 1-dehydrogenase	P11413	G6PD
	GDH/6PGL endoplasmic bifunctional protein	O95479	H6PD
	ADP-dependent glucokinase	Q9BRR6	ADPGK
	Glycogen phosphorylase, liver form	P06737	PYGL
	Glycogen phosphorylase, muscle form	P11217	PYGM
	Glycogen phosphorylase, brain form	P11216	PYGB
	Glucose-6-phosphatase	P35575	G6PC
	Glucose-6-phosphate isomerase	P06744	GPI
	Phosphoglucomutase-1	P36871	PGM1
	Glucose-6-phosphate translocase	O43826	SLC37A4
	Glucokinase regulatory protein	Q14397	GCKR
	Phosphoglucomutase-2	Q96G03	PGM2
	Glucose-6-phosphatase 3	Q9BUM1	G6PC3
	Glucose-6-phosphatase 2	Q9NQR9	G6PC2
	Inositol-3-phosphate synthase 1	Q9NPH2	ISYNA1
	Putative hexokinase HKDC1	Q2TB90	HKDC1
Stearic acid	Fatty acid synthase	P49327	FASN
	Calcium-dependent phospholipase A2	P39877	PLA2G5
	Group IIF secretory phospholipase A2	Q9BZM2	PLA2G2F
	Cytosolic phospholipase A2	P47712	PLA2G4A
	Phospholipase A2	P04054	PLA2G1B
	Group 10 secretory phospholipase A2	O15496	PLA2G10
	Galactoside-binding soluble lectin 13	Q9UHV8	LGALS13
	Group IIE secretory phospholipase A2	Q9NZK7	PLA2G2E
	Group XIIA secretory phospholipase A2	Q9BZM1	PLA2G12A
	85/88 kDa calcium-independent phospholipase A2	O60733	PLA2G6
	Eosinophil lysophospholipase	Q05315	CLC
	Phospholipase A2, membrane associated	P14555	PLA2G2A
	Group IID secretory phospholipase A2	Q9UNK4	PLA2G2D
	Pancreatic triacylglycerol lipase	P16233	PNLIP
	Hepatic triacylglycerol lipase	P11150	LIPC
	Inactive pancreatic lipase-related protein 1	P54315	PNLIPRP1
	Patatin-like phospholipase domain-containing protein 3	Q9NST1	PNPLA3
	Gastric triacylglycerol lipase	P07098	LIPF
	Endothelial lipase	Q9Y5X9	LIPG
	Bile salt-activated lipase	P19835	CEL
	Pancreatic lipase-related protein 2	P54317	PNLIPRP2
	Lipoprotein lipase	P06858	LPL
	Liver carboxylesterase 1	P23141	CES1
	Cocaine esterase	O00748	CES2
	Cholinesterase	P06276	BCHE
	Cytosolic phospholipase A2 gamma	Q9UP65	PLA2G4C
	Hormone-sensitive lipase	Q05469	LIPE
	Group 3 secretory phospholipase A2	Q9NZ20	PLA2G3
	Bile acid-CoA:amino acid N-acyltransferase	Q14032	BAAT
	Acylphosphatase-2	P14621	ACYP2
	Acylphosphatase-1	P07311	ACYP1
	Aminoacylase-1	Q03154	ACY1
	Aspartoacylase	P45381	ASPA
	Aspartoacylase-2	Q96HD9	ACY3
	Cytosolic acyl coenzyme A thioester hydrolase	O00154	ACOT7
	Acyl-coenzyme A thioesterase 2, mitochondrial	P49753	ACOT2
	Acyl-coenzyme A thioesterase 4	Q8N9L9	ACOT4
	Acyl-coenzyme A thioesterase 8	O14734	ACOT8
	Acid ceramidase	Q13510	ASAH1
	Homeodomain-interacting protein kinase 1	Q86Z02	HIPK1
	Peroxisome proliferator-activated receptor gamma	P37231	PPARG
	Long-chain fatty acid transport protein 6	Q9Y2P4	SLC27A6
	Long-chain fatty acid transport protein 3	Q5K4L6	SLC27A3
	Patatin-like phospholipase domain-containing protein 4	P41247	PNPLA4
	Long-chain fatty acid transport protein 1	Q6PCB7	SLC27A1
	Long-chain fatty acid transport protein 4	Q6P1M0	SLC27A4
	60 kDa lysophospholipase	Q86U10	ASPG
	Phospholipase B1, membrane-associated	Q6P1J6	PLB1
	Patatin-like phospholipase domain-containing protein 2	Q96AD5	PNPLA2
	Cytosolic phospholipase A2 delta	Q86XP0	PLA2G4D
	Cytosolic phospholipase A2 epsilon	Q3MJ16	PLA2G4E
	Cytosolic phospholipase A2 zeta	Q68DD2	PLA2G4F
	Calcium-independent phospholipase A2-gamma	Q9NP80	PNPLA8
	Cytosolic phospholipase A2 beta	P0C869	PLA2G4B
	Putative neutral ceramidase C	P0C7U2	ASAH2C
	Alkaline ceramidase 2	Q5QJU3	ACER2
	Neutral ceramidase	Q9NR71	ASAH2
	Carboxylesterase 5A	Q6NT32	CES5A
	Alkaline ceramidase 1	Q8TDN7	ACER1
	Neuropathy target esterase	Q8IY17	PNPLA6
	Pancreatic lipase-related protein 3	Q17RR3	PNLIPRP3
	Acyl-coenzyme A thioesterase 1	Q86TX2	ACOT1
	Carboxylesterase 3	Q6UWW8	CES3
	ADFP protein	Q6FHZ7	ADFP
	Peroxisome proliferator activated-receptor gamma	Q9UEF6	PPARG
	CPT1B protein	A2RRE8	CPT1B
	Peroxisome proliferator-activated receptor	Q6L9M1	PPARG
	CPT1B protein	A5PLL0	CPT1B
	S-acyl fatty acid synthase thioesterase, medium chain	Q9NV23	OLAH
Uridine	5'-nucleotidase	P21589	NT5E
	Cytosolic 5'-nucleotidase 1B	Q96P26	NT5C1B
	Cytosolic 5'-nucleotidase 1A	Q9BXI3	NT5C1A
	5'(3')-deoxyribonucleotidase, cytosolic type	Q8TCD5	NT5C
	5'(3')-deoxyribonucleotidase, mitochondrial	Q9NPB1	NT5M
	Uridine-cytidine kinase 1	Q9HA47	UCK1
	tRNA pseudouridine synthase A, mitochondrial	Q9Y606	PUS1
	H/ACA ribonucleoprotein complex subunit 4	O60832	DKC1
	Uridine-cytidine kinase 2	Q9BZX2	UCK2
	AID	Q546Y9	AID
	Cytosolic 5'-nucleotidase 3	Q9H0P0	NT5C3
	Cytosolic purine 5'-nucleotidase	P49902	NT5C2
	Cytidine deaminase	P32320	CDA
	Uridine phosphorylase 1	Q16831	UPP1
	Uridine phosphorylase 2	O95045	UPP2
	Uridine-cytidine kinase-like 1	Q9NWZ5	UCKL1
	Putative tRNA pseudouridine synthase Pus10	Q3MIT2	PUS10
	tRNA pseudouridine synthase 3	Q9BZE2	PUS3
	tRNA pseudouridine synthase-like 1	Q8N0Z8	PUSL1
	DNA dC->dU-editing enzyme APOBEC-3H	Q6NTF7	APOBEC3H
	Probable DNA dC->dU-editing enzyme APOBEC-3A	P31941	APOBEC3A
	Probable DNA dC->dU-editing enzyme APOBEC-3B	Q9UH17	APOBEC3B
	Probable DNA dC->dU-editing enzyme APOBEC-3C	Q9NRW3	APOBEC3C
	Probable DNA dC->dU-editing enzyme APOBEC-3D	Q96AK3	APOBEC3D
	DNA dC->dU-editing enzyme APOBEC-3F	Q8IUX4	APOBEC3F
	Activation-induced cytidine deaminase	Q9GZX7	AICDA
Thymidine	5'-nucleotidase	P21589	NT5E
	Cytosolic 5'-nucleotidase 1B	Q96P26	NT5C1B
	Cytosolic 5'-nucleotidase 1A	Q9BXI3	NT5C1A
	5'(3')-deoxyribonucleotidase, cytosolic type	Q8TCD5	NT5C
	5'(3')-deoxyribonucleotidase, mitochondrial	Q9NPB1	NT5M
	Solute carrier family 22 member 1	O15245	SLC22A1
	Cytosolic 5'-nucleotidase 3	Q9H0P0	NT5C3
	Cytosolic purine 5'-nucleotidase	P49902	NT5C2
	Solute carrier family 28 member 3	Q9HAS3	SLC28A3
	Thymidine kinase, cytosolic	P04183	TK1
	Thymidine kinase 2, mitochondrial	O00142	TK2
	Thymidine phosphorylase	P19971	TYMP
