# Supplementary material for: Integrating Metabolomics and Network Pharmacology to Explore the Mechanism of Xiao-Yao-San in the Treatment of Inflammatory Response in CUMS Mice
Source: Pharmaceuticals (Basel). 2023 Nov 14;16(11):1607. doi: 10.3390/ph16111607 (PMC10675308; doi:10.3390/ph16111607)
Supplement: Supplementary file 1 [file pharmaceuticals-16-01607-s001.zip › Table S2 Information on intersection targets.xlsx]

## Sheet: Sheet1
Uniprot ID	Protein name	Gene name	Degree	Betweenness	Closeness
P31749	RAC-alpha serine/threonine-protein kinase	AKT1	53	203.946	0.833333
P15692	Vascular endothelial growth factor A, long form	VEGFA	49	108.068	0.792683
P01584	Interleukin-1 beta	IL1B	48	201.641	0.792683
P04637	Cellular tumor antigen p53	TP53	48	159.908	0.783133
P42574	Caspase-3	CASP3	45	81.2199	0.755814
P37231	Peroxisome proliferator-activated receptor gamma	PPARG	44	187.232	0.747126
P35354	Prostaglandin G/H synthase 2	PTGS2	44	88.7831	0.747126
P14780	Matrix metalloproteinase-9	MMP9	42	47.9509	0.730337
P13500	C-C motif chemokine 2	CCL2	42	81.7824	0.730337
P01133	Pro-epidermal growth factor	EGF	42	57.6737	0.730337
P40763	Signal transducer and activator of transcription 3	STAT3	42	85.2882	0.722222
P03372	Estrogen receptor	ESR1	41	149.77	0.730337
P35222	Catenin beta-1	CTNNB1	40	48.8608	0.714286
P10145	Interleukin-8	CXCL8	38	47.4002	0.698925
O00206	Toll-like receptor 4	TLR4	37	67.9166	0.691489
P01100	Protein c-Fos	FOS	36	85.8771	0.691489
P04040	Catalase	CAT	36	66.0588	0.684211
P01579	Interferon gamma	IFNG	36	34.281	0.684211
P05112	Interleukin-4	IL4	33	21.585	0.656566
P05362	Intercellular adhesion molecule 1	ICAM1	33	19.247	0.663265
P09601	Heme oxygenase 1	HMOX1	33	22.5679	0.663265
P60568	Interleukin-2	IL2	32	64.8626	0.643564
P12821	Angiotensin-converting enzyme	ACE	32	174.607	0.663265
P42224	Signal transducer and activator of transcription 1-alpha/beta	STAT1	31	19.3936	0.637255
P05121	Plasminogen activator inhibitor 1	SERPINE1	31	24.0721	0.65
Q04206	Transcription factor p65	RELA	31	14.6923	0.643564
P28482	Mitogen-activated protein kinase 1	MAPK1	30	57.3216	0.637255
P01583	Interleukin-1 alpha	IL1A	28	9.70236	0.619048
P05067	Amyloid-beta precursor protein	APP	28	49.2409	0.631068
P35228	Nitric oxide synthase, inducible	NOS2	25	22.2217	0.601852
P03956	Interstitial collagenase	MMP1	24	3.9056	0.601852
P49841	Glycogen synthase kinase-3 beta	GSK3B	23	2.50071	0.59633
P38936	Cyclin-dependent kinase inhibitor 1	CDKN1A	22	2.91105	0.585586
P10275	Androgen receptor	AR	22	12.8586	0.59633
P08684	Cytochrome P450 3A4	CYP3A4	22	100.17	0.59633
P17936	Insulin-like growth factor-binding protein 3	IGFBP3	21	6.12277	0.585586
P01589	Interleukin-2 receptor subunit alpha	IL2RA	20	15.9412	0.565217
P04798	Cytochrome P450 1A1	CYP1A1	19	34.2853	0.580357
P11511	Aromatase	CYP19A1	18	60.2304	0.575221
P08887	Interleukin-6 receptor subunit alpha	IL6R	18	9.05396	0.560345
P09619	Platelet-derived growth factor receptor beta	PDGFRB	18	2.47	0.560345
P00734	Prothrombin	F2	18	23.0392	0.575221
P14598	Neutrophil cytosol factor 1	NCF1	18	2.34377	0.575221
P04114	Apolipoprotein B-100	APOB	18	24.3326	0.575221
P17302	Gap junction alpha-1 protein	GJA1	18	20.1901	0.565217
P08183	ATP-dependent translocase ABCB1	ABCB1	18	36.9205	0.575221
P00441	Superoxide dismutase [Cu-Zn]	SOD1	17	7.74898	0.565217
Q92731	Estrogen receptor beta	ESR2	16	4.09733	0.560345
P02452	Collagen alpha-1	COL1A1	16	1.58042	0.550848
P27487	Dipeptidyl peptidase 4	DPP4	16	3.23852	0.565217
P09211	Glutathione S-transferase P	GSTP1	16	13.1691	0.560345
Q9UNQ0	Broad substrate specificity ATP-binding cassette transporter ABCG2	ABCG2	15	8.86432	0.555556
P27169	Serum paraoxonase/arylesterase 1	PON1	12	8.77958	0.53719
P05177	Cytochrome P450 1A2	CYP1A2	11	18.2921	0.528455
P31645	Sodium-dependent serotonin transporter	SLC6A4	9	138.792	0.524193
P07550	Beta-2 adrenergic receptor	ADRB2	8	5.6616	0.528455
Q02156	Protein kinase C epsilon type	PRKCE	7	1.09416	0.503876
P14555	Phospholipase A2, membrane associated	PLA2G2A	7	6.33525	0.511811
P10415	Apoptosis regulator Bcl-2	BCL2	7	0.291667	0.503876
Q99572	P2X purinoceptor 7	P2RX7	7	3.59027	0.503876
P35372	Mu-type opioid receptor	OPRM1	6	6.45595	0.5
Q9Y2R2	Tyrosine-protein phosphatase non-receptor type 22	PTPN22	5	1.16876	0.481482
P28845	11-beta-hydroxysteroid dehydrogenase 1	HSD11B1	5	5.02706	0.481482
P02766	Transthyretin	TTR	5	0.181818	0.464286
P80365	11-beta-hydroxysteroid dehydrogenase type 2	HSD11B2	3	1.1844	0.427632
P14867	Gamma-aminobutyric acid receptor subunit alpha-1	GABRA1	1	0	0.345745
				43.8788	0.61272
